# Supplementary material for: Derivation of Pluripotent Cells from Mouse SSCs Seems to Be Age Dependent
Source: Stem Cells Int. 2015 Nov 9;2016:8216312. doi: 10.1155/2016/8216312 (PMC4655302; doi:10.1155/2016/8216312)
Supplement: Supplementary file 1 — In the supplementary method section, we describe in more detail the material and the methods of embryoid body (EB) formation, neuronal differentiation, cardiomyocyte differentiation, RNA extraction and RT-PCR analysis, gene expression analyses (Fluidigm Biomark), immunfluorescence staining (IMH), electrophysiology, FACS analysis, alkaline phosphatase assay, electron microscopy, production of teratoma and chimeric mice, and the statistical analysis. [file 8216312.f1.zip]

Archive with 5 entries (3 files):
- mat.646972.v2/
- mat.646972.v2/646972.supp/
- mat.646972.v2/646972.supp/646972_Author_201509171657_6.avi
- mat.646972.v2/646972.supp/mat.646972.v1.pdf
- mat.646972.v2/646972.supp/Supplementary Tables.docx
